# Supplementary material for: SCREENING CUTOFF VALUES TO IDENTIFY THE RISK OF FALLS AFTER STROKE: A SCOPING REVIEW
Source: PubMed Central journal article supplement (PMC11520422; doi:10.2340/jrm.v56.40560), 2024-10-24
Supplement: JRM-56-40560-s1.pdf [file JRM-56-40560-s1.pdf]

**Table SI.** List of fall-related indicators with AUC of 0.7 or higher and its cutoff values

| Author (year)               | Post-stroke | Main selection criteria of participants                                                                                                   | Fall monitoring |           | Predictor         | Cutoff | AUC  | Sensitivity | Specificity |
|-----------------------------|-------------|-------------------------------------------------------------------------------------------------------------------------------------------|-----------------|-----------|-------------------|--------|------|-------------|-------------|
|                             |             |                                                                                                                                           | Period          | Setting   |                   |        |      |             |             |
| An et al. (2014)            | Chronic     | The ability to walk more than 10 m without a walking aid & MMSE $\geq 24$                                                                 | Last 12 months  | Unclear   | POMA              | 12.5   | 0.78 | 72%         | 74%         |
| An et al. (2017)            | Chronic     | The ability to walk more than 10 m without a walking aid & MMSE $> 24$                                                                    | Last 6 months   | Unclear   | DGI-4             | 9.5    | 0.77 | 68%         | 59%         |
|                             |             |                                                                                                                                           |                 |           | DGI-8             | 16.5   | 0.78 | 60%         | 72%         |
| Belgen et al. (2006)        | Chronic     | The ability to walk 10 m with no physical assistance with or without any assistive device & the ability to follow 3-step commands         | Last 6 months   | Community | BBS               | 52     | 0.72 | 91%         | 42%         |
|                             |             |                                                                                                                                           |                 |           | Swedish FES       | 17.5   | 0.71 | 90%         | 53%         |
| Beninato et al. (2009)      | Chronic     | The ability to ambulate independently at least 10 m with or without an assistive device & the ability to follow 3-step commands           | Last 6 months   | Community | ABC Scale         | 81.1   | 0.92 | 100%        | 72%         |
|                             |             |                                                                                                                                           |                 |           | BBS               | 49     | 0.76 | 78%         | 72%         |
|                             |             |                                                                                                                                           |                 |           | SIS-16            | 61.7   | 0.86 | 78%         | 89%         |
| Faria-Fortini et al. (2021) | Chronic     | The ability to walk 10 m with or without an assistive device<br>Except for MMSE $< 13$ or $18$ or $26$ (education-adjusted cutoff scores) | Last 6 months   | Community | FES-International | 28     | 0.71 | 71%         | 57%         |
| Huo et al. (2009)           | Chronic     | The ability to walk independently with or without a cane<br>Except for higher cortical dysfunction or severe impairment of speech         | Last 12 months  | Unclear   | P-RT              | 626    | 0.77 | 86%         | 70%         |
| Kızılkaya et al. (2023)     | Chronic     | First unilateral anterior circulation stroke & MMSE $\geq 24$<br>The ability to walk at least 10 m without assistance, and BRS 3–6        | Last 6 months   | Unclear   | Turkish FAB       | 21.5   | 0.75 | 84%         | 61%         |

|                        |                   |                                                                                                                      |                      |           |               |       |      |     |     |
|------------------------|-------------------|----------------------------------------------------------------------------------------------------------------------|----------------------|-----------|---------------|-------|------|-----|-----|
| Maeda et al. (2009)    | Chronic           |                                                                                                                      | During hospital stay | Hospital  | BBS           | 29    | 0.81 | 80% | 78% |
| Persson et al. (2011)  | Acute             | First-ever stroke & except for diagnosis of dementia or severe psychiatric diseases                                  | 12 months            | Unclear   | 10MWT         | 12    | 0.74 | 80% | 58% |
|                        |                   |                                                                                                                      |                      |           | M-MAS UAS-95  | 50    | 0.72 | 74% | 58% |
|                        |                   |                                                                                                                      |                      |           | SwePASS       | 32    | 0.73 | 82% | 50% |
|                        |                   |                                                                                                                      |                      |           | TUG           | 15    | 0.7  | 63% | 58% |
| Sahin et al. (2019)    | Chronic           | The ability to stand for 2 min unassisted, and walk unassisted or assisted (with cane) 6 m & MMSE $\geq 24$          | Last 12 months       | Unclear   | ABC Scale     | 55.31 | 0.78 | 75% | 81% |
|                        |                   |                                                                                                                      |                      |           | BBS           | 46.5  | 0.81 | 75% | 77% |
|                        |                   |                                                                                                                      |                      |           | BESTest       | 69.44 | 0.84 | 75% | 85% |
| Takatori et al. (2009) | Subacute, chronic | The ability to stand unassisted for at least 1 min<br>MMSE $\geq 24$ , and no severe higher brain function disorders | 3 months             | Hospital  | EED           | 6.3   | 0.8  | 80% | 78% |
| Takatori et al. (2009) | Subacute, chronic | The ability to stand unassisted for at least 1 min<br>MMSE $\geq 24$ , and no severe higher brain function disorders | 5 months             | Hospital  | EED           | 6.1   | 0.7  | 69% | 82% |
|                        |                   |                                                                                                                      |                      |           | EED           | 6.3   | 0.8  | 81% | 78% |
| Tsang et al. (2013)    | Chronic           | The ability to understand verbal instructions                                                                        | Last 12 months       | Community | BBS           | 50.5  | 0.72 | 52% | 80% |
| Yamasaki et al. (2023) | Subacute          | First stroke involving the vertebrobasilar territory                                                                 | 1 month              | Hospital  | STV           | 6.35  | 0.84 | 80% | 74% |
| Zou et al. (2021)      | Chronic           | Single and unilateral stroke                                                                                         | 12 months            | Hospital  | Turn duration | 4     | 0.75 | 67% | 80% |
|                        |                   |                                                                                                                      |                      |           | Turn step     | 7     | 0.73 | 56% | 85% |

AUC, area under the curve; MMSE, Mini-Mental State Examination; POMA, Performance-Oriented Mobility Assessment; DGI, Dynamic Gait Index; BBS, Berg Balance Scale; FES, Falls Efficacy Scale; ABC Scale; Activities-specific Balance Confidence Scale; SIS, Stroke Impact Scale; P-RT, Probe Reaction Time; BRS, Brunnstrom Recovery Stage; FAB, Fullerton Advanced Balance Scale; 10MWT, 10 Meter Walk Test; M-MAS UAS-95, Modified Motor Assessment Scale Uppsala Akademiska Sjukhus; SwePASS, Swedish version of the Postural Assessment Scale for Stroke patients; TUG, Timed Up and Go; BESTest, Balance Evaluation Systems Test; EED, error in estimated distance; STV, stride time variability
